# Supplementary material for: A triphasic nanocomposite with a synergetic interfacial structure as a trifunctional catalyst toward electrochemical oxygen and hydrogen reactions
Source: Royal Society of Chemistry journal article supplement (doi:10.1039/d0ta10514g), 2021-01-01
Supplement: d0ta10514g1.pdf [file d0ta10514g1.pdf]

**Electronic Supplementary Information (ESI) for**

**A triphasic nanocomposites with synergetic interfacial structure as efficient  
trifunctional electrocatalysts for electrochemical oxygen and hydrogen reactions**

Ying Wang\*, Hongjie Yuan, Fan Liu, Tianjun Hu†

Key Laboratory of Magnetic Molecules & Magnetic Information Materials Ministry of Education,  
The School of Chemical and Material Science, Shanxi Normal University, Linfen 041004, China.

---

\* Corresponding author. E-mail address: wangyinghc@sxnu.edu.cn (Y. Wang)

† Corresponding author. E-mail address: hutj@sxnu.edu.cn (T. Hu)

## **Physical Characterization**

The crystal structure of samples was tested by X-ray diffraction (XRD) using Rigaku ultima IV diffractometer. The morphology was characterized by Scanning electron microscopy (SEM) using JFC1600 microscope. Transmission electron microscopy (TEM) and high-resolution transmission electron microscopy (HRTEM) characterization was completed by using JEM-2100 instrument. The valence states of chemical elements were characterized by X-ray photoelectron spectroscopy (XPS) using VG ESCALAB 210 instrument. The compositions of the products were examined by inductively coupled plasma-optical emission spectrometry (ICP-OES, X Series 2, Thermo Scientific USA).

## **Electrochemical Measurements**

The catalytic activity was performed on a CHI 660E electrochemical workstation with a standard three-electrode system, where Hg/HgO and Pt wire (OER) or graphite rod (HER) used as the reference electrode and counter electrode, respectively. The rotating disk electrode ( $0.126 \text{ cm}^2$ ) with catalysts loading of  $0.2 \text{ mg cm}^{-2}$  was used as the working electrode. The ORR and OER tests were carried out in  $\text{O}_2$ -saturated  $0.1 \text{ M KOH}$  solution with sweep rate of  $10 \text{ mV s}^{-1}$ . The HER measurements were performed in  $\text{N}_2$ -saturated  $1 \text{ M KOH}$  solution with a scan rate of  $5 \text{ mV s}^{-1}$ . The Nyquist plots were measured in a frequency range from  $100 \text{ kHz}$  to  $0.1 \text{ Hz}$  with potential amplitude of  $5 \text{ mV}$ . The electrochemically active surface area (ECSA) can be evaluated by the double-layer capacitance ( $C_{dl}$ ) which is determined via cyclic voltammetry (CV) method.

The rechargeable Zn-air batteries were tested in  $6 \text{ M KOH}$  with home-made electrochemical cell. A polished Zn plate and a carbon paper coated with the prepared catalyst ink ( $1 \text{ mg cm}^{-2}$ ) were used as the anode and air cathode, respectively. The conventional Pt/C +  $\text{RuO}_2$  mixture catalyst with 1:1 mass ratio was prepared with the same mass loading.

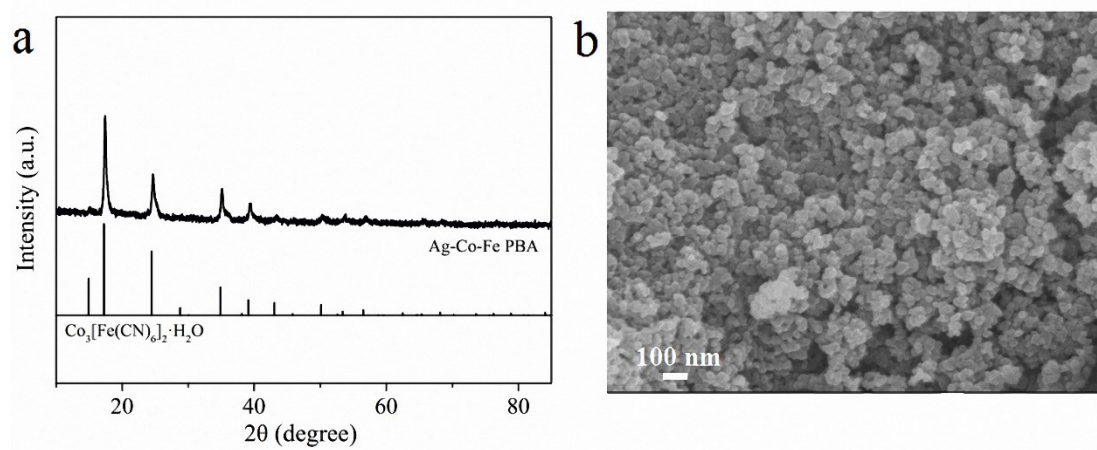

**Fig. S1** (a) The XRD pattern of Ag-Co-Fe-PBA; (b) SEM image of Ag-Co-Fe-PBA.

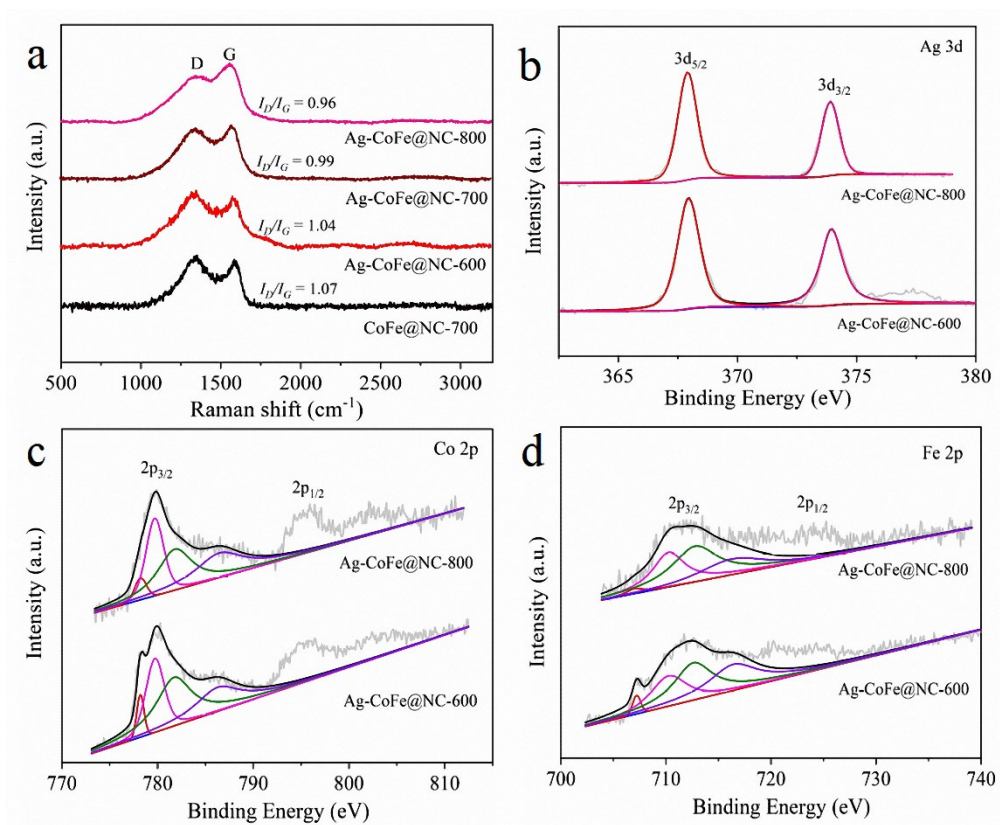

**Fig. S2** (a) Raman spectra of samples; (b-d) XPS spectra of Ag 3d, Co 2p and Fe 2p of Ag-CoFe@NC-600 and Ag-CoFe@NC-800.

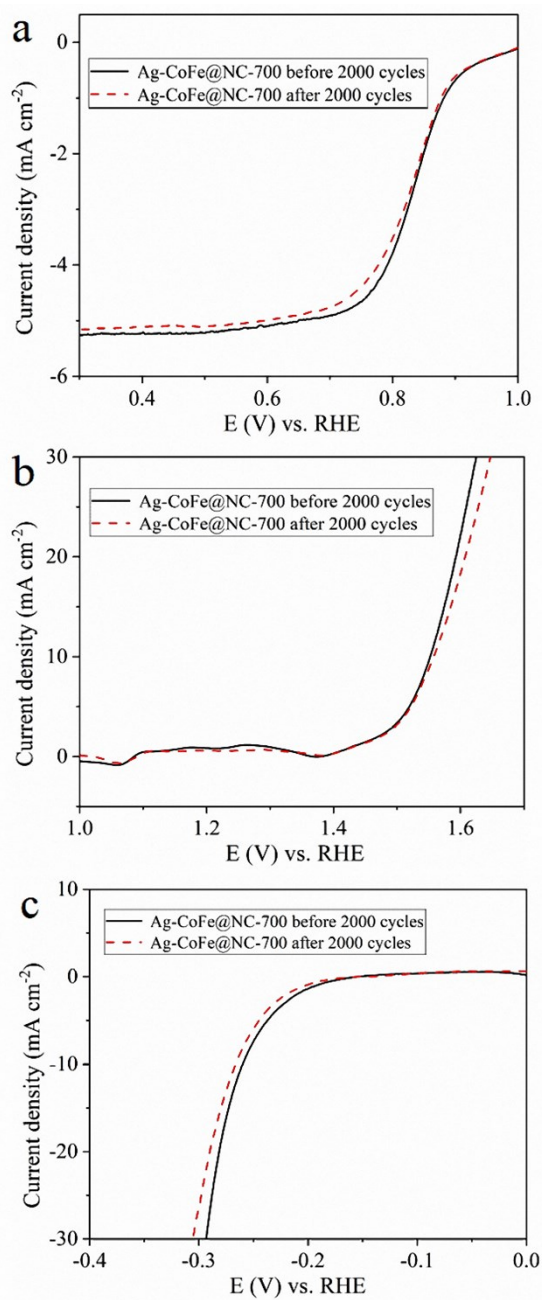

**Fig. S3** LSV curves of Ag-CoFe@NC-700 for ORR (a), OER (b) and HER (c) before and after 2000 cycles.

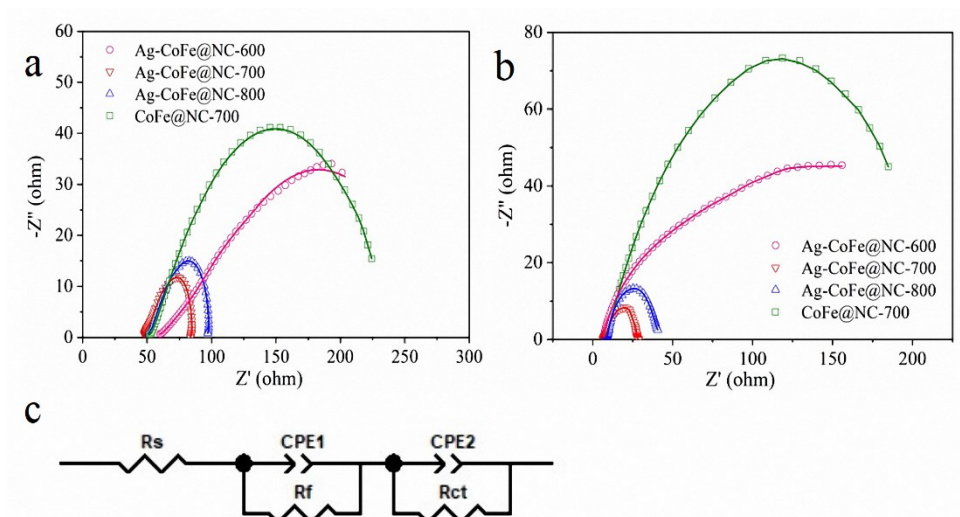

**Fig. S4** (a) Nyquist plots of Ag-CoFe@NC samples obtained from EIS measurements at the potential of 1.55 V for OER; (b) Nyquist plots of Ag-CoFe@NC samples obtained from EIS measurements at the potential of -0.26 V for HER; (c) Equivalent electrical circuit used to model OER and HER kinetics process, where  $R_s$  is the solution resistance.  $R_f$  is the resistance associated to the GCE/catalyst interface, and  $R_{ct}$  is the charge transfer resistance at catalyst/electrolyte interface.

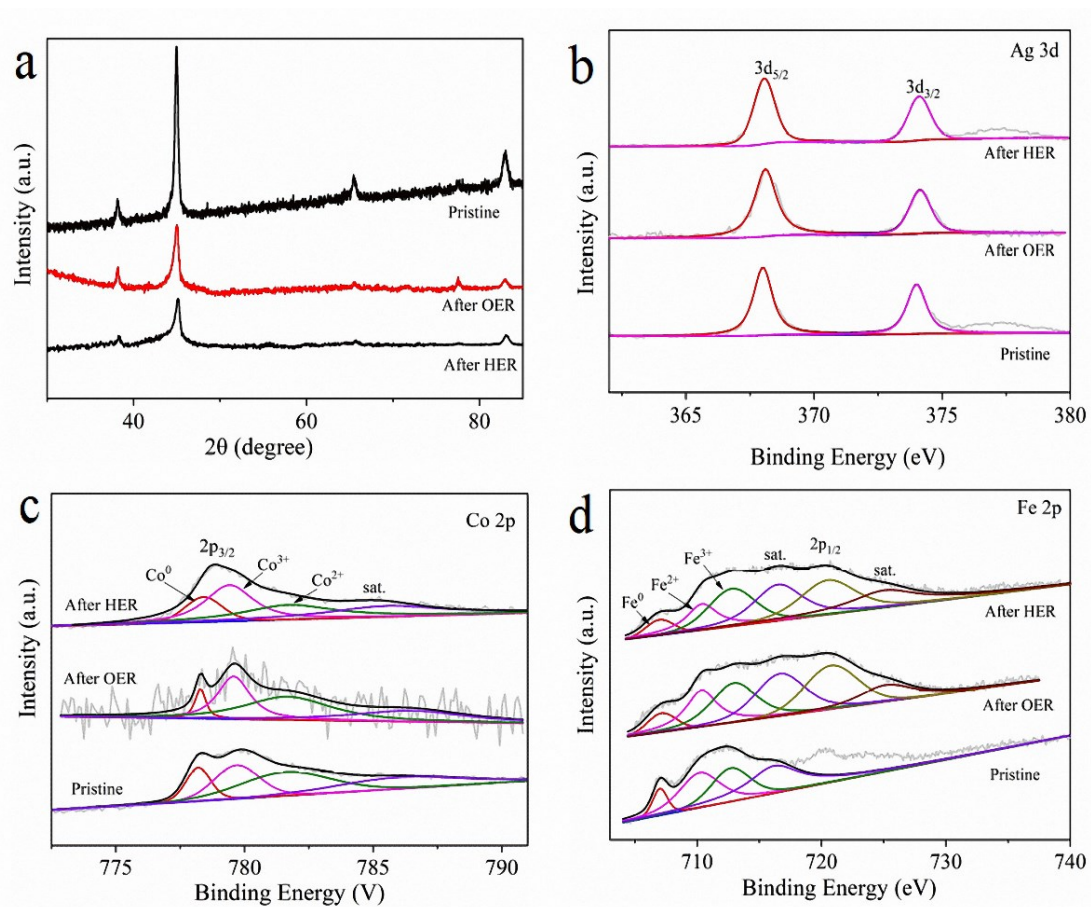

**Fig. S5** (a) The XRD patterns of Ag-CoFe@NC-700 before and after stability test; (b)-(d) XPS spectra of Ag 3d, Co 2p and Fe 2p for Ag-CoFe@NC-700 before and after stability test.

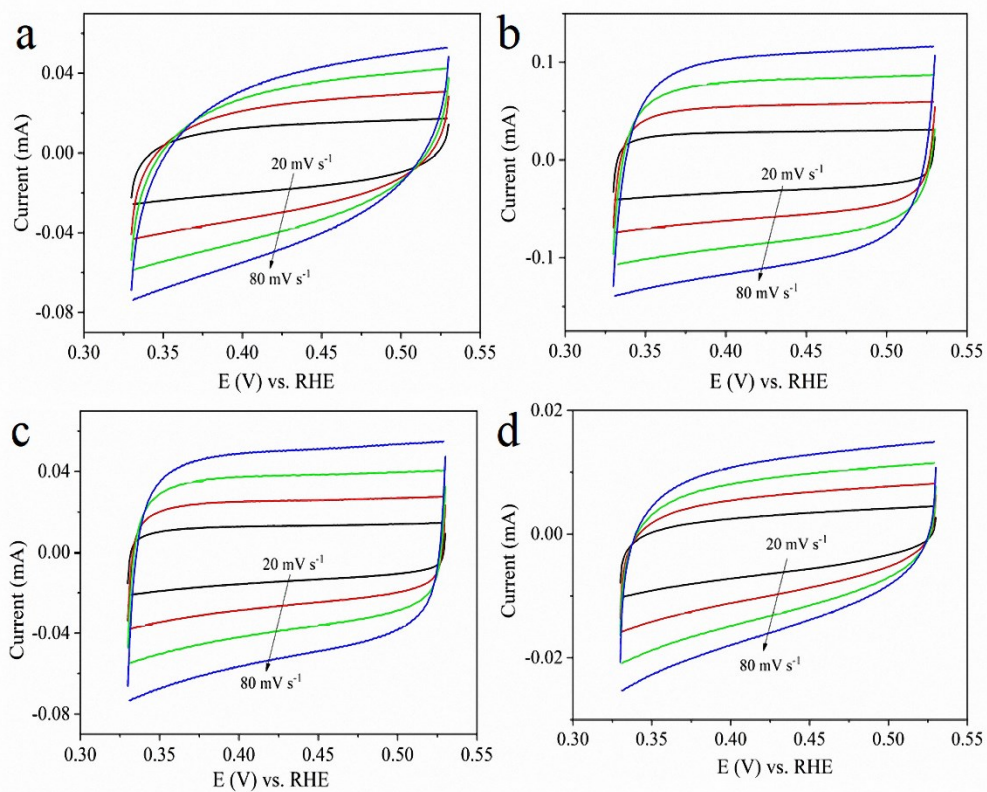

**Fig. S6** CV curves at different scan rates for Ag-CoFe@NC-600 (a), Ag-CoFe@NC-700 (b), Ag-CoFe@NC-800 (c) and CoFe@NC-700 (d).



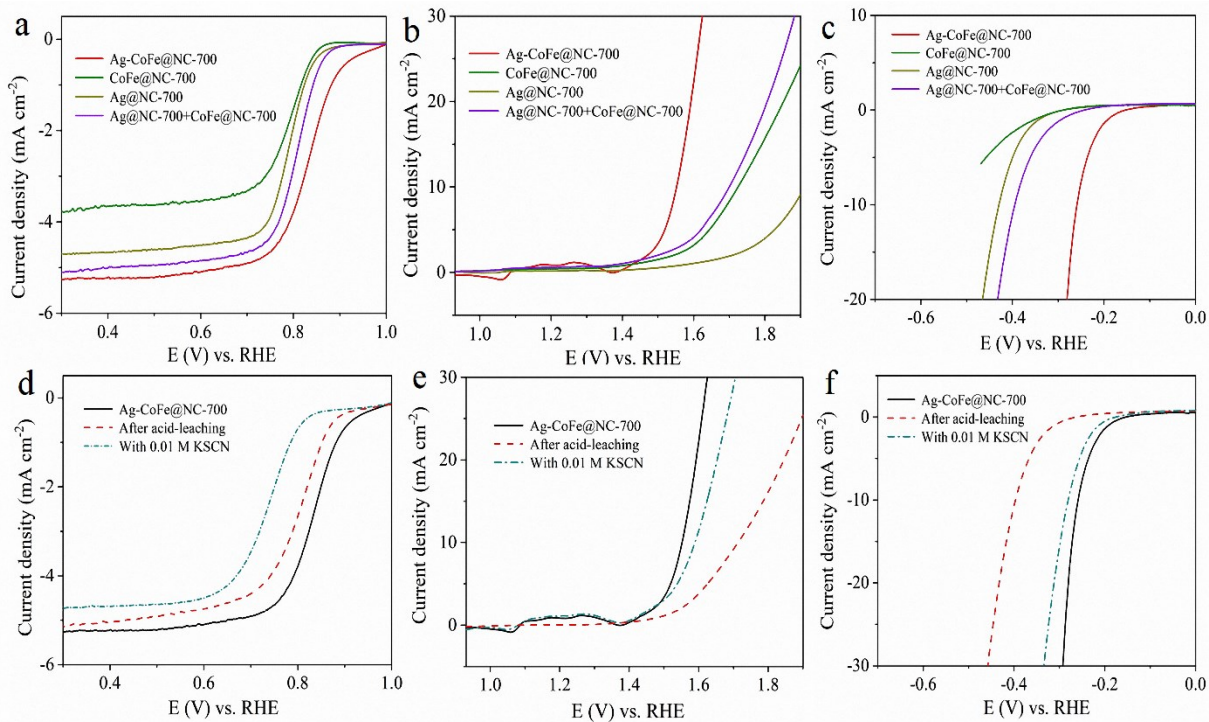

**Fig. S7** LSV curves of Ag-CoFe@NC-700, CoFe@NC-700, Ag@NC-700 and Ag@NC-700+CoFe@NC-700 (1:7.4) for ORR (a), OER (b) and HER (c); LSV curves for ORR (d), OER (e) and HER (f) before and after acid-leaching and poisoning treatment with 0.01 KSCN in electrolyte.

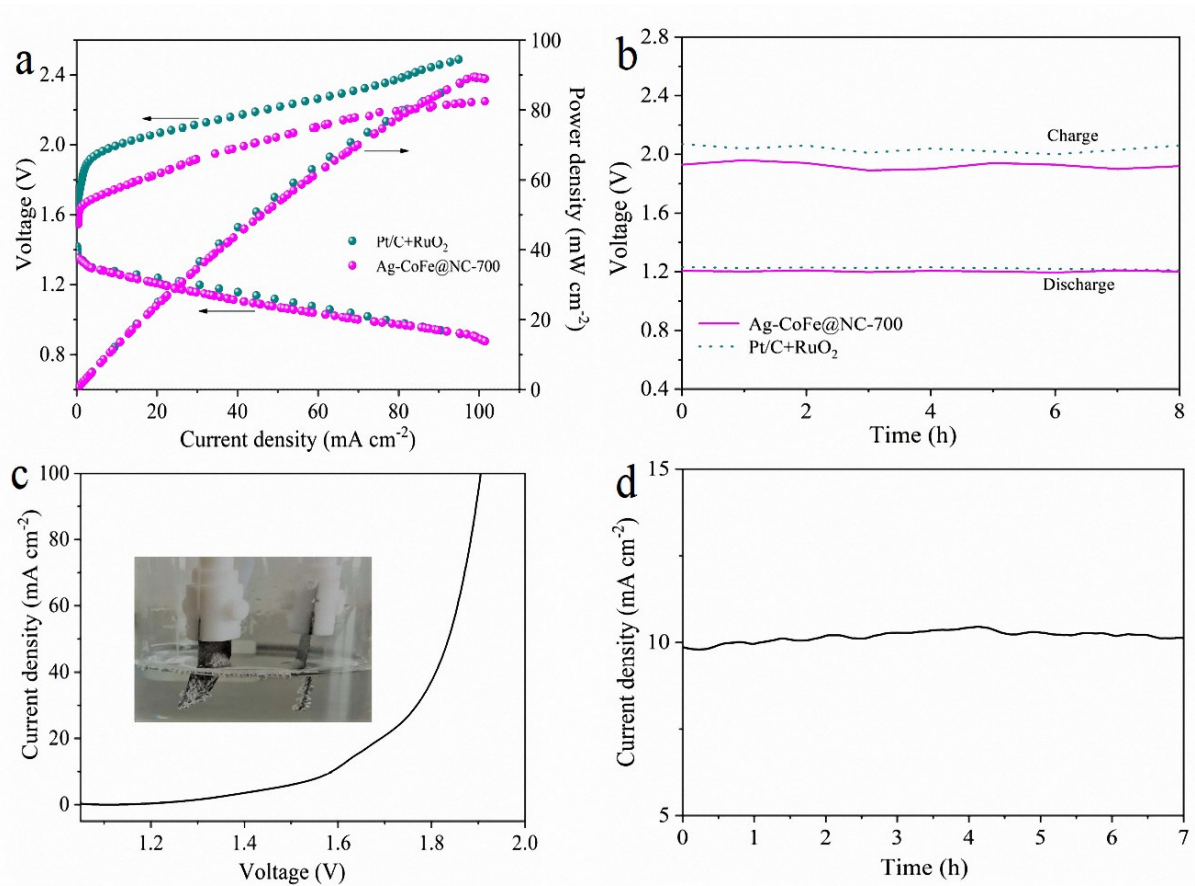

**Fig. S8** (a) Charge and discharge polarization curves and the power densities of zinc-air battery via using Ag-CoFe@NC-700 and Pt/C + RuO<sub>2</sub> as the air catalysts, respectively; (b) Long-time galvanostatic discharge and charge curves at 20 mA cm<sup>-2</sup>; (c) LSV curves of water electrolysis based on Ag-CoFe@NC-700 in 1 M KOH. The inset shows the photograph of the generation of hydrogen and oxygen bubbles on electrode; (d) The durability test at 10 mA cm<sup>-2</sup>.

**Table S1** The surface chemical compositions of catalyst obtained by XPS.

| Sample         | C (at.%) | O (at.%) | Ag (at.%) | Co (at.%) | Fe (at.%) | N (at.%) |
|----------------|----------|----------|-----------|-----------|-----------|----------|
| Ag-CoFe@NC-600 | 80.78    | 11.85    | 0.52      | 1.51      | 1.45      | 3.89     |
| Ag-CoFe@NC-700 | 82.10    | 9.48     | 0.71      | 2.13      | 2.06      | 3.52     |
| Ag-CoFe@NC-800 | 84.92    | 8.29     | 0.62      | 1.92      | 1.82      | 2.43     |
| CoFe@NC-700    | 79.28    | 16.24    | -         | 1.14      | 1.09      | 2.25     |

**Table S2** N 1s components of samples collected from XPS results.

| Sample         | Total N content<br>(at.%) | Relative peak area percentage (%) <sup>a</sup> |      |       |       |       |
|----------------|---------------------------|------------------------------------------------|------|-------|-------|-------|
|                |                           | N1                                             | N2   | N3    | N4    | N5    |
| Ag-CoFe@NC-600 | 3.89                      | 27.51                                          | 6.13 | 45.53 | 9.12  | 11.71 |
| Ag-CoFe@NC-700 | 3.52                      | 32.17                                          | 6.65 | 32.54 | 17.42 | 11.22 |
| Ag-CoFe@NC-800 | 2.43                      | 1.93                                           | 1.84 | 21.33 | 53.96 | 20.94 |
| CoFe@NC-700    | 2.25                      | 11.42                                          | 2.41 | 70.55 | 15.62 | -     |

<sup>a</sup> N1: pyridinic N; N2: M-N; N3: pyrrolic N; N4: graphitic N; N5: oxidized N.

**Table S3** The chemical composition obtained by ICP-OES.

| Sample         | Ag (wt.%) | Co (wt.%) | Fe (wt.%) |
|----------------|-----------|-----------|-----------|
| Ag-CoFe@NC-600 | 1.61      | 4.38      | 4.49      |
| Ag-CoFe@NC-700 | 2.20      | 6.39      | 5.97      |
| Ag-CoFe@NC-800 | 1.90      | 5.86      | 5.42      |
| CoFe@NC-700    | -         | 3.42      | 3.38      |
| Ag@NC-700      | 8.78      | -         | -         |

**Table S4** Comparison in the oxygen electrode activities

| Catalyst material                                                          | $E_{j=1/2}$ (V)    | $E_{j=10}$ (V) | $\Delta E$ (V) | Reference |
|----------------------------------------------------------------------------|--------------------|----------------|----------------|-----------|
| Ag-CoFe@NC-700                                                             | 0.83               | 1.55           | 0.72           | This work |
| Co-Co <sub>3</sub> O <sub>4</sub> @NAC                                     | 0.80               | 1.61           | 0.81           | [1]       |
| HHPC                                                                       | 0.78               | 1.58           | 0.80           | [2]       |
| Co@CNT/MS                                                                  | 0.84               | 1.62           | 0.78           | [3]       |
| FeCo@NCNS                                                                  | 0.83               | 1.60           | 0.77           | [4]       |
| FeCo-NCNFs-800                                                             | 0.82               | 1.69           | 0.87           | [5]       |
| Ni <sub>3</sub> Fe/N-C sheets                                              | 0.78               | 1.62           | 0.84           | [6]       |
| FeCo/FeCoNi@NCNTs-HF                                                       | 0.85               | 1.61           | 0.76           | [7]       |
| FeNiCo@NC-P                                                                | 0.84               | 1.54           | 0.70           | [8]       |
| DAP-DAB-C <sub>4</sub> H <sub>6</sub> O <sub>4</sub> ·Co·4H <sub>2</sub> O | 0.88               | 1.60           | 0.72           | [9]       |
| H-Co@FeCo/N/C                                                              | 0.91               | 1.61           | 0.70           | [10]      |
| C-MOF-C2-900                                                               | 0.82               | 1.58           | 0.76           | [11]      |
| 3C-900                                                                     | 0.82 ( $E_{j=3}$ ) | 1.60           | 0.78           | [12]      |
| NiCo-0.8@N-CNFs-800                                                        | 0.82               | 1.61           | 0.79           | [13]      |
| Co@Co <sub>3</sub> O <sub>4</sub> /N-C                                     | 0.81               | 1.62           | 0.81           | [14]      |
| FeNi/N-CPCF-950                                                            | 0.87               | 1.59           | 0.72           | [15]      |
| Co <sub>9</sub> S <sub>8</sub> -NSHPCNF                                    | 0.82               | 1.58           | 0.76           | [16]      |

## References

- [1] X. Zhong, W. Yi, Y. Qu, L. Zhang, H. Bai, Y. Zhu, J. Wan, S. Chen, M. Yang, L. Huang, M. Gu, H. Pan, B. Xu, *Appl. Catal. B, Environ.* 260 (2020) 118188.
- [2] X. Xiao, X. Li, Z. Wang, G. Yan, H. Guo, Q. Hu, L. Li, Y. Liu, J. Wang, *Appl. Catal. B, Environ.* 265 (2020) 118603.
- [3] C. Xiao, J. Luo, M. Tan, Y. Xiao, B. Gao, Y. Zheng, B. Lin, *J. Power Sources* 453 (2020) 227900.
- [4] T. Liu, S. Cai, Z. Gao, S. Liu, H. Li, L. Chen, M. Li, H. Guo, *Electrochim. Acta* 335 (2020) 135647.
- [5] L. Yang, S. Feng, G. Xu, B. Wei, L. Zhang, *ACS Sustain. Chem. Eng.* 7 (2019)

5462-5475.

[6] G. Fu, Z. Cui, Y. Chen, Y. Li, Y. Tang, J.B. Goodenough, *Adv. Energy Mater.* 7 (2017) 1601172.

[7] Z. Wang, J. Ang, B. Zhang, Y. Zhang, X.Y.D. Ma, T. Yan, J. Liu, B. Che, Y. Huang, X. Lu, *Appl. Catal. B, Environ.* 254 (2019) 26-36.

[8] D. Ren, J. Ying, M. Xiao, Y.P. Deng, J. Ou, J. Zhu, G. Liu, Y. Pei, S. Li, A.M. Jauhar, H. Jin, S. Wang, D. Su, A. Yu, Z. Chen, *Adv. Funct. Mater.* 30 (2019) 1908167.

[9] D. Lyu, Y. Du, S. Huang, B.Y. Mollamahale, X. Zhang, S.W. Hasan, F. Yu, S. Wang, Z.Q. Tian, P.K. Shen, *ACS Appl Mater Interfaces* 11 (2019) 39809-39819.

[10] Y.-j. Wu, X.-h. Wu, T.-x. Tu, P.-f. Zhang, J.-t. Li, Y. Zhou, L. Huang, S.-g. Sun, *Appl. Catal. B, Environ.* 278 (2020) 119259.

[11] M. Zhang, Q. Dai, H. Zheng, M. Chen, L. Dai, *Adv. Mater.* 30 (2018) 1705431.

[12] T. Li, Y. Lu, S. Zhao, Z.-D. Gao, Y.-Y. Song, *J. Mater. Chem. A* 6 (2018) 3730-3737.

[13] C. Feng, Y. Guo, Y. Xie, X. Cao, S. Li, L. Zhang, W. Wang, J. Wang, *Nanoscale* 12 (2020) 5942-5952.

[14] Y. Wang, T. Hu, Y. Qiao, Y. Chen, L. Zhang, *Chem. Commun.* 54 (2018) 12746-12749.

[15] Z. Wang, J. Ang, J. Liu, X.Y.D. Ma, J. Kong, Y. Zhang, T. Yan, X. Lu, *Appl. Catal. B, Environ.* 263 (2020) 118344.

[16] W. Peng, Y. Wang, X. Yang, L. Mao, J. Jin, S. Yang, K. Fu, G. Li, *Appl. Catal. B, Environ.* 268 (2020) 118437.
